# Supplementary material
Source: HighWire-hosted journal article supplement (https://www.rsfjournal.org/highwire/filestream/4356/field_highwire_adjunct_files/0/Annex_Figure_A1.docx)
Supplement: Annex_Figure_A1.docx [file Annex_Figure_A1.docx]

**Figure A1**

Map of Matching U.S. Counties

| 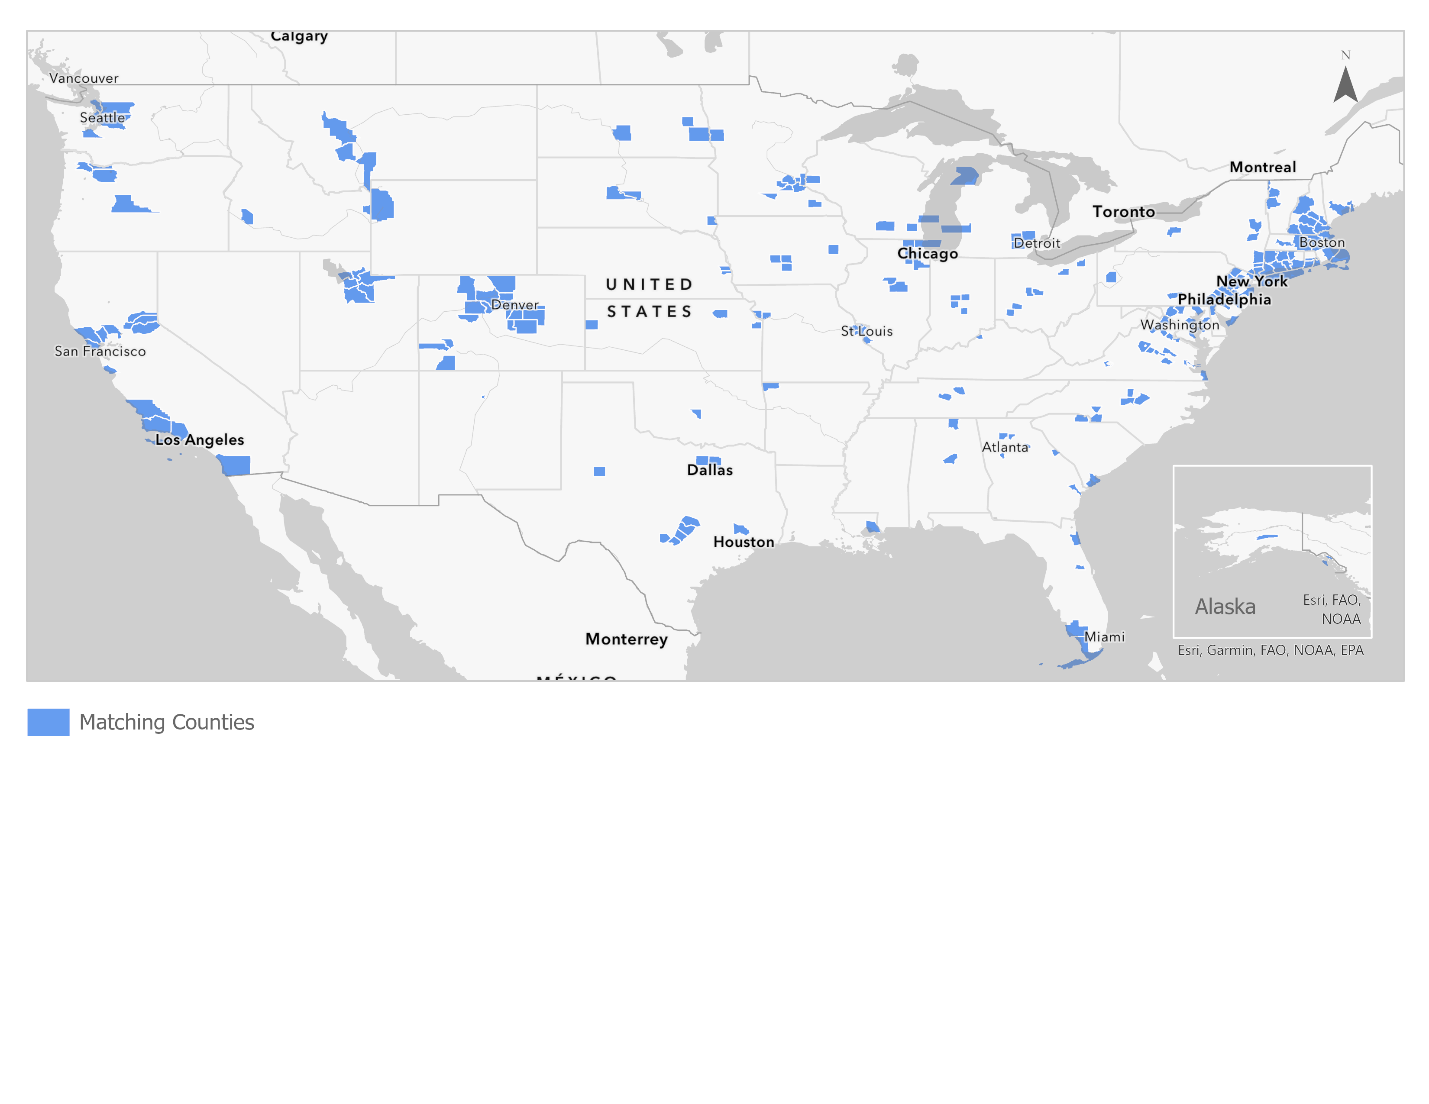 |
| --- |
| *Map source: Authors' mapping projection and calculations conducted in ArcGIS Pro.*  *Data source: SimplyAnalytics & US Census Bureau American Community Survey Data.* |
